# Supplementary material
Source: Springer Nature journal article supplement (https://www.springermedizin.de/resource/supplementary/12885_2012_3332_MOESM2_ESM.pdf/9463584)
Supplement: MOESM2 [file 9463584]

**Inclusion criteria**

- ◆ CLTR breast cancer  $\geq 20\%$
- ◆ 30-55 years
- ◆ Informed consent obtained

**Exclusion criteria**

- ◆ BRCA1/2 mutation carrier
- ◆ 50% likelihood of such a mutation
- ◆ Contra-indication MRI
- ◆ Invasive carcinoma in medical history

Randomized 1:1

**Intervention**

- ◆ Yearly MRI + CBE
- ◆ Year 1 & 3: mammography
- ◆ Breast density measurement

**Current practice**

- ◆ Yearly mammography + CBE
- ◆ Breast density measurement
